# Supplementary material for: Association of systemic immune-inflammation index with all-cause and cardio-cerebrovascular mortality in individuals with diabetic kidney disease: evidence from NHANES 1999-2018
Source: PubMed Central journal article supplement (PMC11628304; doi:10.3389/fendo.2024.1399832), 2024-11-26

## Supplementary Figure 1

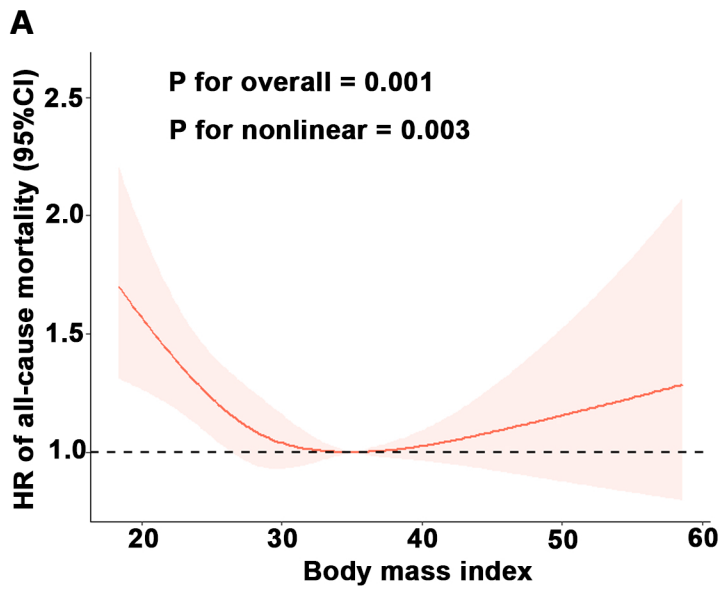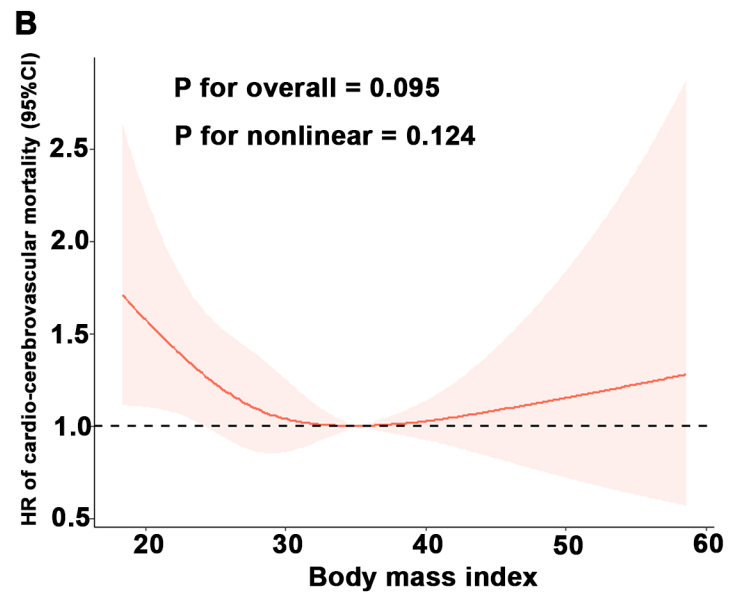

Supplement: Image1.pdf [file Image1.pdf]
